# Supplementary material for: Impact of a 12-week personalized dietary intervention on vascular function and cardiovascular risk factors
Source: Research Square preprint supplement (doi:10.21203/rs.3.rs-4162501/v1), 2024-04-26
Supplement: Supplementary file 1 [file be7c0c53b9003bee8566156d.docx]

Supplemental information

| Table S1. Changes in vascular function, cardiovascular risk factors, and glucose homeostasis: PhenoDiet group A *versus* PhenoDiet group B. | | | | | |
| --- | --- | --- | --- | --- | --- |
| Outcome | Diet group | **Model 3*** | | **Model 4*** | |
| **β [95% CI]** | **P-value** | **β [95% CI]** | **P-value** |
| CAR%, % | B | REF | - | REF | - |
| A | 0.06 [-0.80 –0.92] | 0.891 | 0.01 [-0.89–0.92] | 0.977 |
| CARAUC, cm*s | B | REF | - | REF | - |
| A | -0.29 [-0.97–0.39] | 0.393 | -0.29 [-0.99–0.41] | 0.416 |
| SBP, mmHg | B | REF | - | REF | - |
| A | 2.34 [-1.12–5.79] | 0.182 | 3.58 [-0.07–7.23] | 0.054 |
| DBP, mmHg | B | REF | - | REF | - |
| A | 0.90 [-1.57–3.38] | 0.471 | 0.97 [-1.56–3.50] | 0.449 |
| TC, mmol/L | B | REF | - | REF | - |
| A | 0.14 [-0.05–0.32] | 0.142 | 0.18 [-0.02–0.37] | 0.079 |
| HDL, mmol/L | B | REF | - | REF | - |
| A | 0.03 [-0.01–0.07] | 0.192 | 0.04 [-0.01–0.08] | 0.103 |
| TC/HD, ratio | B | REF | - | REF | - |
| A | 0.01 [-0.13–0.16] | 0.851 | 0.01 [-0.14–0.15] | 0.922 |
| FRS | B | REF | - | REF | - |
| A | 0.45 [-0.27–1.16] | 0.217 | 0.54 [-0.18–1.26] | 0.140 |
| Weight, kg | B | NA | NA | REF | - |
| A | NA | NA | 0.63 [-0.32–1.57] | 0.191 |
| WHR | B | REF | - | REF | - |
| A | -0.01 [-0.02–0.01] | 0.333 | -0.01 [-0.02–0.01] | 0.412 |
| Matsuda | B | REF | - | REF | - |
| A | -1.18 [-3.01–0.66] | 0.205 | -1.55 [-3.56–0.46] | 0.130 |
| HOMA-IR | B | REF | - | REF | - |
| A | 0.03 [-0.20–0.26] | 0.805 | 0.06 [-0.18–0.30] | 0.608 |
| Disposition index | B | REF | - | REF | - |
| A | 10.16 [-57.56–77.88] | 0.766 | 21.40 [-46.43–89.23] | 0.532 |
| CAR, carotid artery reactivity; AUC, area under the curve; SBP, systolic blood pressure; DBP, diastolic blood pressure; TC, total cholesterol; HDL, high-density lipoprotein; FRS, Framingham risk score; WHR, waist-to-hip ratio; HOMA-IR, Homeostatic Model Assessment of Insulin Resistance. *Linear regression models testing differences in the change (week 12 minus baseline) in the outcome variable between PhenoDiet group A and group B. Model 3: corrected for baseline values, age, sex and weight change; Model 4: corrected for baseline values, age, sex and change in physical activity (% awake time), physical activity data were available for N=93. NA, not applicable. | | | | | |

| Table S2. Changes in vascular function, cardiovascular risk factors, and glucose homeostasis: LFHP *versus* HMUFA diet. | | | | | |
| --- | --- | --- | --- | --- | --- |
| Outcome |  | **Model 3*** | | **Model 4*** | |
| **β [95% CI]** | **P-value** | **β [95% CI]** | **P-value** |
| CAR%, % | LFHP | REF | - | REF | - |
| HMUFA | 0.51 [-0.35–1.37] | 0.242 | 0.48 [-0.43–1.40] | 0.293 |
| CARAUC, cm*s | LFHP | REF | - | REF | - |
| HMUFA | 0.45 [-0.23–1.13] | 0.191 | 0.42 [-0.28–1.13] | 0.237 |
| SBP, mmHg | LFHP | REF | - | REF | - |
| HMUFA | 3.02 [-0.40–6.44] | 0.083 | 3.12 [-0.56–6.81] | 0.096 |
| DBP, mmHg | LFHP | REF | - |  |  |
| HMUFA | 2.41 [-0.00–4.83] | 0.050 | 2.26 [-0.27–4.79] | 0.079 |
| TC, mmol/L | LFHP | REF | - |  |  |
| HMUFA | 0.22 [0.05–0.40] | 0.014 | 0.21 [0.01–0.40] | 0.043 |
| HDL, mmol/L | LFHP | REF | - |  |  |
| HMUFA | 0.05 [0.01–0.09] | 0.014 | 0.06 [0.02–0.11] | 0.009 |
| TC/HD, ratio | LFHP | REF | - |  |  |
| HMUFA | -0.02 [-0.16–0.12] | 0.792 | -0.07 [-0.22–0.08] | 0.336 |
| FRS | LFHP | REF | - |  |  |
| HMUFA | 0.31 [-0.41–1.02] | 0.395 | 0.16 [-0.58–0.90] | 0.667 |
| Weight, kg | LFHP | NA | NA |  |  |
| HMUFA | NA | NA | 0.44 [-0.52–1.40] | 0.367 |
| WHR | LFHP | REF | - |  |  |
| HMUFA | 0.00 [-0.01–0.02] | 0.884 | 0.00 [-0.01–0.02] | 0.770 |
| Matsuda | LFHP | REF | - |  |  |
| HMUFA | -2.40 [-4.17–(-0.63)] | 0.008 | -2.95 [-4.92–(-0.99)] | 0.004 |
| HOMA-IR | LFHP | REF | - |  |  |
| HMUFA | 0.23 [0.01–0.45] | 0.045 | 0.30 [0.06–0.53] | 0.014 |
| Disposition index | LFHP | REF | - |  |  |
| HMUFA | 3.13 [-64.12–70.38] | 0.927 | -7.51 [-76.51–61.49] | 0.829 |
| LFHP, low-fat, high-protein diet; HMUFA, high-monounsaturated fatty acid diet; CAR, carotid artery reactivity; AUC, area under the curve; SBP, systolic blood pressure; DBP, diastolic blood pressure; TC, total cholesterol; HDL, high-density lipoprotein; FRS, Framingham risk score; HOMA-IR, Homeostatic Model Assessment of Insulin Resistance. *Linear regression models testing differences in the change (week 12 minus baseline) in the outcome variable between PhenoDiet group A and group B. Model 3: corrected for baseline values, age, sex and weight change; Model 4: corrected for baseline values, age, sex and change in physical activity (% awake time), physical activity data were available for N=93. ##For HOMA-IR, significance was driven by two participants. Exclusion resulted in non-significant differences (Model 3: P=0.227, Model 4: P=0.084). NA, not applicable. | | | | | |
